# Supplementary material
Source: Springer Nature journal article supplement (https://www.springermedizin.de/resource/supplementary/12913_2013_2988_MOESM2_ESM.pdf/9532628)

# Proportion of type 1 diabetic patients satisfied with various dimensions of their diabetes care in the two health centres

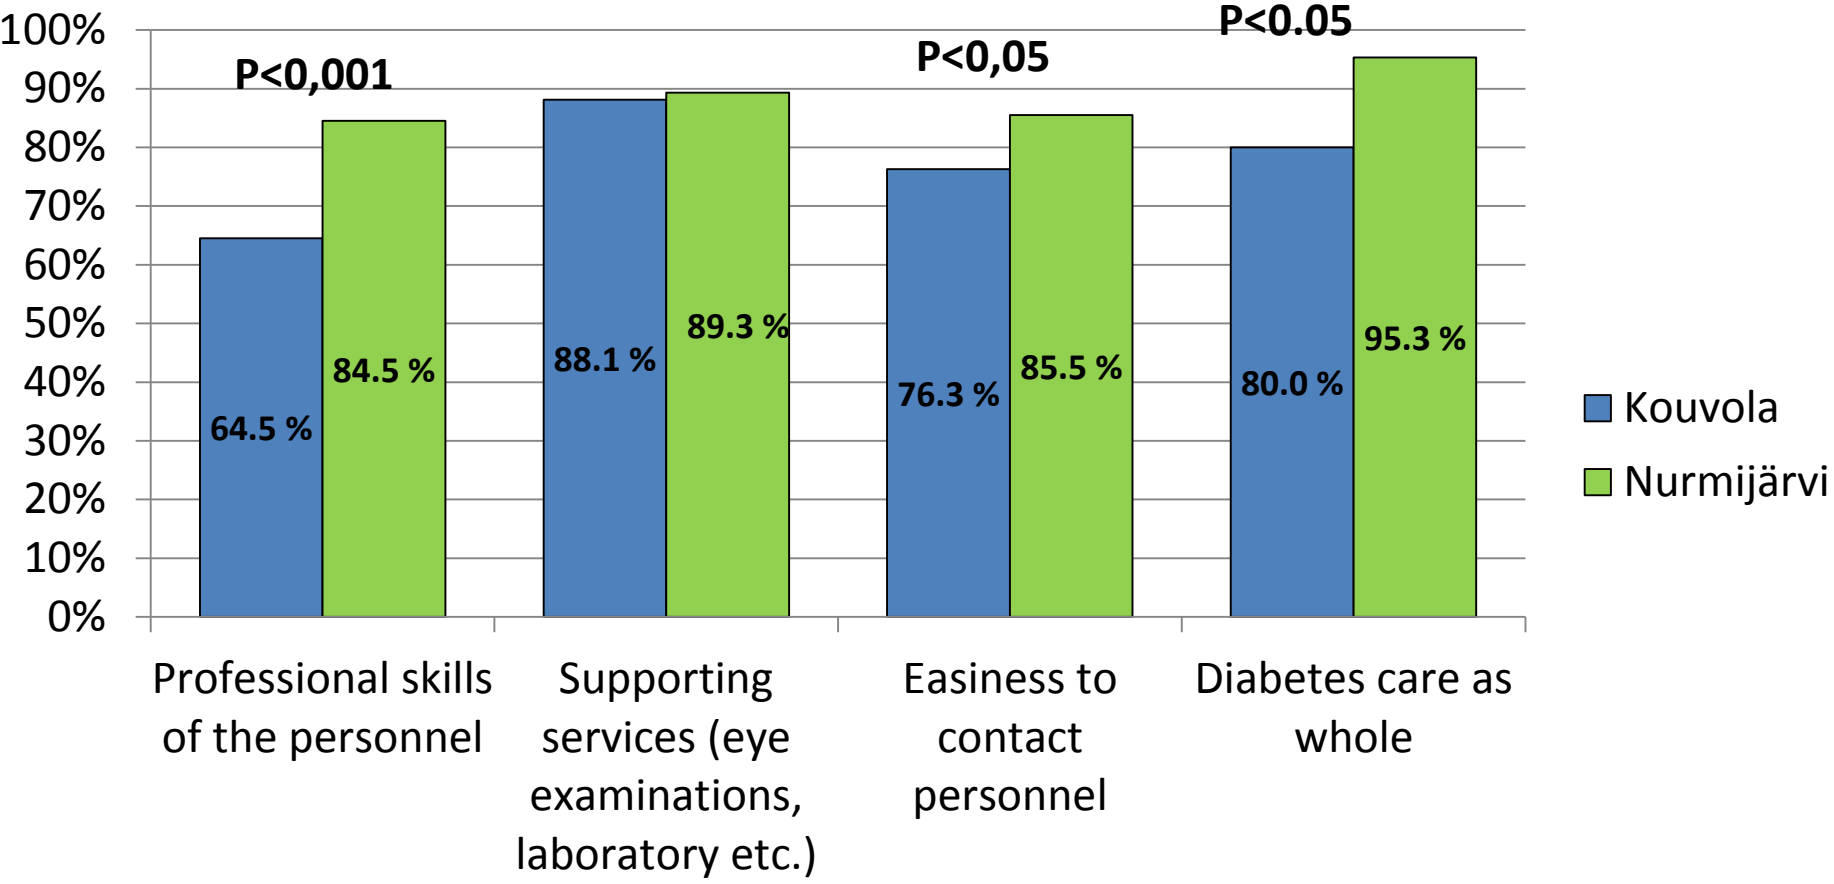

Supplement: MOESM2 [file 9532628]
